# Supplementary material for: Physicochemical, Pre-Clinical, and Biological Evaluation of Viscosity Optimized Sodium Iodide-Incorporated Paste
Source: MDPI journal article supplement (doi:10.3390/pharmaceutics15041072), 2023-03-27
Supplement: s1 [file s1]

**Supplemental Table S1.** Manufacturer and Chemical composition of material used in present study

| Materials | Composition, details    | Manufacturer                                                   |
|-----------|-------------------------|----------------------------------------------------------------|
| I30H      | Calcium Hydroxide 33.3% | Sigma–Aldrich, Burlington, MA, USA                             |
|           | Iodoform 33.3%          | Alfa Aesar, Heysham, LA 2XY, UK                                |
|           | Silicone Oil 33.3%      | Sylgard 184, Dow Corning Co., Midland, MI, USA                 |
| I30M      | Calcium Hydroxide 33.3% | Sigma–Aldrich, Burlington, MA, USA                             |
|           | Iodoform 33.3%          | Alfa Aesar, Heysham, LA 2XY, UK                                |
|           | Silicone Oil 33.3%      | Shin-Etsu Silicone KF-96, Shin-Etsu Chemical Co., Tokyo, Japan |
| I30L      | Calcium Hydroxide 33.3% | Sigma–Aldrich, Burlington, MA, USA                             |
|           | Iodoform 33.3%          | Alfa Aesar, Heysham, LA 2XY, UK                                |
|           | Silicone Oil 33.3%      | Shin-Etsu Silicone KF-96, Shin-Etsu Chemical Co., Tokyo, Japan |
| D30H      | Calcium Hydroxide 33.3% | Sigma–Aldrich, Burlington, MA, USA                             |
|           | Sodium Iodide 33.3%     | Sigma–Aldrich, Burlington, MA, USA                             |
|           | Silicone Oil 33.3%      | Sylgard 184, Dow Corning Co., Midland, MI, USA                 |
| D30M      | Calcium Hydroxide 33.3% | Sigma–Aldrich, Burlington, MA, USA                             |
|           | Sodium Iodide 33.3%     | Sigma–Aldrich, Burlington, MA, USA                             |
|           | Silicone Oil 33.3%      | Shin-Etsu Silicone KF-96, Shin-Etsu Chemical Co., Tokyo, Japan |
| D30L      | Calcium Hydroxide 33.3% | Sigma–Aldrich, Burlington, MA, USA                             |
|           | Sodium Iodide 33.3%     | Sigma–Aldrich, Burlington, MA, USA                             |
|           | Silicone Oil 33.3%      | Shin-Etsu Silicone KF-96, Shin-Etsu Chemical Co., Tokyo, Japan |

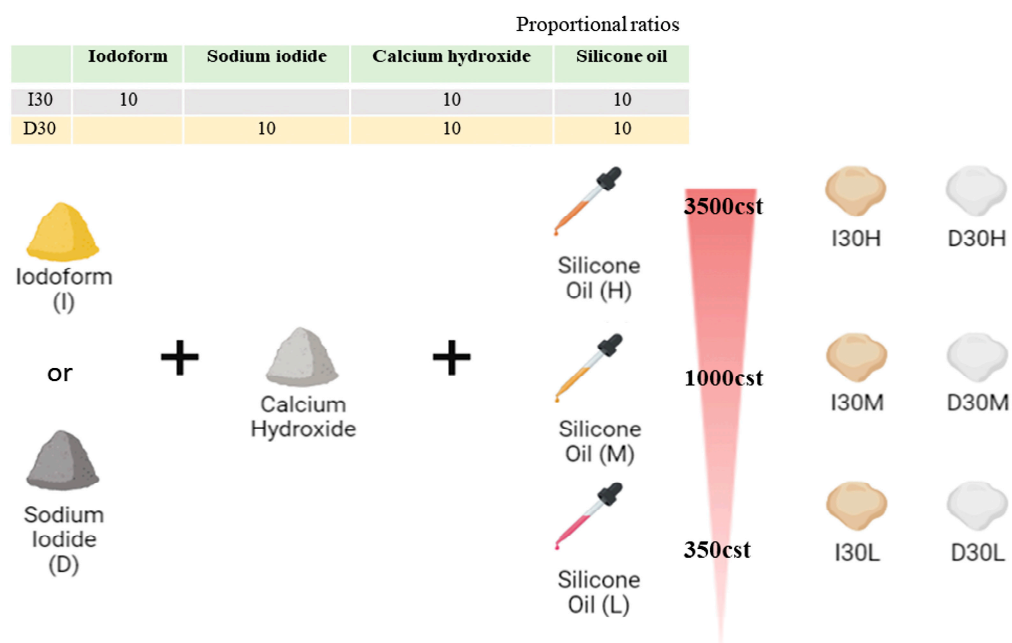

**Supplemental Figure S1.** Schematic figure of mixed materials.

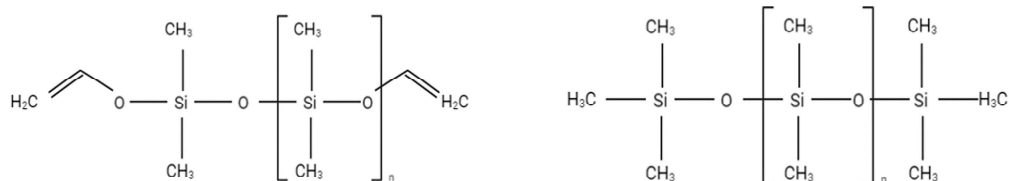

**Sylgard 184 silicone elastomer (Polydimethylsiloxane)**

**KF-96 (dimethylpolysiloxane)**

**Supplemental Figure S2.** Chemical structure of silicone oil H and silicone oil M, L.

|                            | I30L | D30L |
|----------------------------|------|------|
| Flow                       | -    | ↑    |
| Film Thickness             | -    | ↓    |
| Radiopacity                | -    | -    |
| Solubility                 | ↓    | -    |
| pH                         | -    | ↑    |
| Ion release                | -    | ↑    |
| Viscosity                  | -    | ↓    |
| Injection Force            | -    | ↓    |
| Filling Ability            | -    | ↑    |
| Filling Removability       | -    | ↑    |
| Cell Viability             | ↑    | -    |
| Osteoclast Differentiation | -    | ↓    |
| mRNA expression            | -    | ↓    |



**Supplemental Figure S3. Summary of overall experiments on I30L and D30L.** Except for solubility, D30L exhibited better physicochemical and biological outcomes.
